# Supplementary material
Source: publisher figshare collection journal article supplement (https://tandf.figshare.com/articles/dataset/_/6632921)
Supplement: Supplementary file 1 [file 1]

Supplemental table 2. Percent of women entering prenatal care after the sixth month gestation by race or ethnicity, health care payer and maternal factor

| Health care payer                                          | Public Insurance   |            |            |            | Private Insurance  |            |            |            |
|------------------------------------------------------------|--------------------|------------|------------|------------|--------------------|------------|------------|------------|
| Race or ethnicity                                          | White non-Hispanic | Hispanic   | Black      | Asian      | White non-Hispanic | Hispanic   | Black      | Asian      |
|                                                            | %                  | %          | %          | %          | %                  | %          | %          | %          |
| <b>Percent of total sample entering prenatal care late</b> | <b>4.7</b>         | <b>3.7</b> | <b>4.5</b> | <b>3.9</b> | <b>0.8</b>         | <b>1.7</b> | <b>2.0</b> | <b>0.9</b> |
| Less than 18 years at term                                 | 6.6                | 6.6        | 7.6        | 10.0       | 5.3                | 6.2        | 8.4        | 15.6       |
| More than 34 years at term                                 | 5.5                | 3.1        | 4.8        | 3.1        | 0.4                | 1.2        | 1.1        | 0.6        |
| Less than 12 years education                               | 7.0                | 4.0        | 6.6        | 4.9        | 4.4                | 3.5        | 6.6        | 3.3        |
| More than 12 years education                               | 3.8                | 3.2        | 3.6        | 3.7        | 0.6                | 1.1        | 1.4        | 0.8        |
| Nulliparous                                                | 4.2                | 4.1        | 4.7        | 4.4        | 0.8                | 1.9        | 2.1        | 1.0        |
| Smoked                                                     | 7.3                | 6.0        | 6.7        | 6.4        | 2.8                | 2.7        | 3.2        | 1.7        |
| Drugs or alcohol use                                       | 8.8                | 7.3        | 6.5        | 10.6       | 3.8                | 4.2        | 4.2        | 4.3        |
| Mental illness                                             | 7.3                | 5.8        | 6.1        | 7.8        | 1.4                | 2.1        | 3.2        | 1.2        |
| WIC participant                                            | 4.4                | 3.5        | 4.3        | 3.5        | 2.1                | 2.3        | 2.7        | 1.8        |
| FIPS 2                                                     | 4.7                | 3.2        | 3.9        | 4.8        | 0.9                | 1.5        | 2.1        | 1.0        |
| FIPS 3                                                     | 4.4                | 4.6        | 5.1        | 4.1        | 0.9                | 1.5        | 2.4        | 1.3        |
| FIPS 4, 5, or 6                                            | 5.6                | 7.1        | 7.7        | 6.3        | 1.6                | 4.1        | 6.9        | 2.9        |

WIC: Women, Infants and Children's program; FIPS: Federal Information Processing Standard, scale of 1 (most urban) to 6 (most rural)
