# Supplementary material
Source: publisher figshare collection journal article supplement (https://tandf.figshare.com/articles/dataset/_/6632921)
Supplement: Supplementary file 2 [file 1]

Archive with 3 entries (3 files):
- ijmf_a_1463366_sm2938.pdf
- ijmf_a_1463366_sm2937.pdf
- ijmf_a_1463366_sm2934.pdf
