# Supplementary material
Source: publisher figshare collection journal article supplement (https://tandf.figshare.com/articles/dataset/_/6632921)
Supplement: Supplementary file 2 [file 1 › ijmf_a_1463366_sm2934.pdf]

Supplemental table 1. Sample characteristics

| <b><u>Characteristic</u></b> | <b>n (%)</b>             |
|------------------------------|--------------------------|
| <b><u>Sample</u></b>         | <b>2,963,888 (100.0)</b> |
| <b>Race or ethnicity</b>     |                          |
| White non-Hispanic           | 773,352 (26.1)           |
| Hispanic                     | 1,445,356 (48.8)         |
| Black                        | 158,802 (5.4)            |
| Asian                        | 366,732 (12.4)           |
| Other <sup>a</sup>           | 219,646 (7.4)            |
| <b>Payer for delivery</b>    |                          |
| Private Insurance            | 1,373,539 (46.3)         |
| Public Insurance             | 1,430,439 (48.3)         |
| Other <sup>a</sup>           | 159,210 (5.4)            |
| <b>WIC participant</b>       | 1,581,613 (53.4)         |
| <b>Maternal age at term</b>  |                          |
| Less than 18 years           | 85,717 (2.9)             |
| 18 – 34 years                | 2,351,645 (79.3)         |
| More than 34 years           | 526,415 (17.8)           |
| <b>Maternal education</b>    |                          |
| Less than 12 years           | 708,807 (23.9)           |
| 12 years                     | 757,846 (25.6)           |
| More than 12 years           | 1,387,778 (46.8)         |

|                    |           |
|--------------------|-----------|
| <b>Nulliparous</b> | 1,179,477 |
|--------------------|-----------|

**Timing of entry into prenatal care**

|                                           |                  |
|-------------------------------------------|------------------|
| Less than 4 <sup>th</sup> month gestation | 2,415,742 (81.5) |
|-------------------------------------------|------------------|

|                                                                 |                |
|-----------------------------------------------------------------|----------------|
| 4 <sup>th</sup> to 6 <sup>th</sup> month gestation <sup>a</sup> | 396,537 (13.4) |
|-----------------------------------------------------------------|----------------|

|                                           |              |
|-------------------------------------------|--------------|
| More than 6 <sup>th</sup> month gestation | 79,421 (2.7) |
|-------------------------------------------|--------------|

**FIPS county code**

|                |                  |
|----------------|------------------|
| 1 (most urban) | 1,856,574 (62.6) |
|----------------|------------------|

|   |                |
|---|----------------|
| 2 | 359,770 (12.1) |
|---|----------------|

|   |                |
|---|----------------|
| 3 | 563,266 (19.0) |
|---|----------------|

|   |               |
|---|---------------|
| 4 | 120,638 (4.1) |
|---|---------------|

|   |              |
|---|--------------|
| 5 | 34,552 (1.2) |
|---|--------------|

|                |              |
|----------------|--------------|
| 6 (most rural) | 13,738 (0.5) |
|----------------|--------------|

WIC: Women, Infants and Children's program; FIPS: Federal Information Processing Standard,  
scale of 1 (most urban) to 6 (most rural)

<sup>a</sup> Not included in analyses
