# Supplementary material
Source: publisher figshare collection journal article supplement (https://tandf.figshare.com/articles/dataset/_/6632921)
Supplement: Supplementary file 2 [file 1 › ijmf_a_1463366_sm2938.pdf]

Supplemental table 3. Risk of late entry into prenatal care by race or ethnicity and payer for delivery

|                                                            | Timing of entry into prenatal care |                    |                |
|------------------------------------------------------------|------------------------------------|--------------------|----------------|
|                                                            | Less than 4 months                 | More than 6 months | cRR (95%CI)    |
|                                                            | n (row %)                          | n (row %)          |                |
| <b>White non-Hispanic, private insurance (n = 550,265)</b> | <b>503,803 (91.6)</b>              | <b>4,150 (0.8)</b> |                |
| <b>Maternal age (years)</b>                                |                                    |                    |                |
| Less than 18 (n = 2,272)                                   | 1,521 (67.0)                       | 121 (5.3)          | 7.9 (6.6, 9.5) |
| 18 to 34 (n = 397,967)                                     | 362,415 (91.1)                     | 3,402 (0.9)        | Reference      |
| More than 34 (n = 150,012)                                 | 139,855 (93.2)                     | 627 (0.4)          | 0.5 (0.4, 0.5) |
| <b>Maternal education (years)</b>                          |                                    |                    |                |
| Less than 12 (n = 8,476)                                   | 6,213 (73.3)                       | 376 (4.4)          | 3.5 (3.1, 3.9) |
| 12 (n = 80,183)                                            | 69,442 (86.6)                      | 1,147 (1.4)        | Reference      |
| More than 12 (n = 452,580)                                 | 420,283 (92.9)                     | 2,521 (0.6)        | 0.4 (0.3, 0.4) |
| <b>Parity</b>                                              |                                    |                    |                |
| Nulliparous (n = 254,271)                                  | 233,488 (91.8)                     | 2,059 (0.8)        | 1.1 (1.1, 1.2) |
| Multiparous (n = 295,810)                                  | 270,234 (91.4)                     | 2,089 (0.7)        | Reference      |
| <b>Smoked</b>                                              |                                    |                    |                |
| No (n = 533,189)                                           | 490,103 (91.9)                     | 3,666 (0.7)        | Reference      |
| Yes (n = 17,076)                                           | 13,700 (80.2)                      | 484 (2.8)          | 4.6 (4.2, 5.1) |
| <b>Drugs or alcohol use</b>                                |                                    |                    |                |
| No (n = 545,077)                                           | 499,825 (91.7)                     | 3,954 (0.7)        | Reference      |
| Yes (n = 5,188)                                            | 3,978 (76.7)                       | 196 (3.8)          | 6.0 (5.2, 6.9) |
| <b>Mental illness</b>                                      |                                    |                    |                |
| No (n = 529,398)                                           | 485,182 (91.7)                     | 3,849 (0.7)        | Reference      |
| Yes (n = 20,867)                                           | 18,621 (89.2)                      | 301 (1.4)          | 2.0 (1.8, 2.3) |
| <b>WIC participant</b>                                     |                                    |                    |                |
| No (n = 493,458)                                           | 456,339 (92.5)                     | 3,073 (0.6)        | Reference      |
| Yes (n = 48,582)                                           | 40,201 (82.8)                      | 1,017 (2.1)        | 3.7 (3.4, 4.0) |
| <b>FIPS Code</b>                                           |                                    |                    |                |
| 1 (most urban) (n = 328,498)                               | 304,191 (92.6)                     | 1,960 (0.6)        | Reference      |
| 2 (n = 85,393)                                             | 78,454 (91.9)                      | 737 (0.9)          | 1.5 (1.3, 1.6) |
| 3 (n = 98,401)                                             | 89,266 (90.7)                      | 861 (0.9)          | 1.5 (1.4, 1.6) |
| 4, 5 or 6 (n = 35,406)                                     | 29,610 (83.6)                      | 551 (1.6)          | 2.9 (2.6, 3.1) |
| <b>White non-Hispanic, public insurance (n = 185,271)</b>  | <b>131,436 (70.9)</b>              | <b>8,730 (4.7)</b> |                |

|                                                  |                |             |                |
|--------------------------------------------------|----------------|-------------|----------------|
| <b>Maternal age (years)</b>                      |                |             |                |
| Less than 18 (n = 4,678)                         | 2,866 (61.3)   | 308 (6.6)   | 1.6 (1.4, 1.8) |
| 18 – 34 (n = 163,069)                            | 116,201 (71.3) | 7,457 (4.6) | Reference      |
| More than 34 (n = 17,522)                        | 12,359 (70.5)  | 965 (5.5)   | 1.2 (1.1, 1.3) |
| <b>Maternal education (years)</b>                |                |             |                |
| Less than 12 (n = 33,421)                        | 20,975 (62.8)  | 2,335 (7.0) | 1.6 (1.6, 1.7) |
| 12 (n = 73,729)                                  | 52,177 (70.8)  | 3,394 (4.6) | Reference      |
| More than 12 (n = 73,890)                        | 55,446 (75.0)  | 2,793 (3.8) | 0.8 (0.7, 0.8) |
| <b>Parity</b>                                    |                |             |                |
| Nulliparous (n = 77,417)                         | 55,731 (72.0)  | 3,276 (4.2) | 0.8 (0.8, 0.9) |
| Multiparous (n = 107,755)                        | 75,669 (70.2)  | 5,452 (5.1) | Reference      |
| <b>Smoked</b>                                    |                |             |                |
| No (n = 147,993)                                 | 108,737 (73.5) | 6,014 (4.1) | Reference      |
| Yes (n = 37,278)                                 | 22,699 (60.9)  | 2,716 (7.3) | 2.0 (1.9, 2.1) |
| <b>Drugs or alcohol use</b>                      |                |             |                |
| No (n = 170,877)                                 | 123,280 (72.2) | 7,465 (4.4) | Reference      |
| Yes (n = 14,394)                                 | 8,156 (56.7)   | 1,265 (8.8) | 2.4 (2.2, 2.5) |
| <b>Mental illness</b>                            |                |             |                |
| No (n = 168,129)                                 | 120,762 (71.8) | 7,473 (4.4) | Reference      |
| Yes (n = 16,553)                                 | 10,674 (62.3)  | 1,257 (7.3) | 1.8 (1.7, 1.9) |
| <b>WIC participant</b>                           |                |             |                |
| No (n = 51,630)                                  | 35,761 (69.3)  | 2,838 (5.7) | Reference      |
| Yes (n = 129,265)                                | 92,710 (71.7)  | 5,652 (4.4) | 0.8 (0.7, 0.8) |
| <b>FIPS Code</b>                                 |                |             |                |
| 1 (most urban) (n = 79,726)                      | 58,145 (72.9)  | 3,582 (4.5) | Reference      |
| 2 (n = 24,496)                                   | 17,627 (72.0)  | 1,158 (4.7) | 1.1 (1.0, 1.1) |
| 3 (n = 46,435)                                   | 33,285 (71.7)  | 2,056 (4.4) | 1.0 (0.9, 1.1) |
| 4, 5 or 6 (n = 33,903)                           | 21,966 (64.8)  | 1,881 (5.6) | 1.4 (1.3, 1.4) |
| <b>Hispanic, private insurance (n = 408,372)</b> |                |             |                |
| <b>Maternal age (years)</b>                      |                |             |                |
| Less than 18 (n = 9,740)                         | 6,030 (61.9)   | 608 (6.2)   | 4.7 (4.4, 5.2) |
| 18 – 34 (n = 323,316)                            | 276,961 (85.7) | 5,462 (1.7) | Reference      |
| More than 34 (n = 75,311)                        | 66,030 (87.7)  | 895 (1.2)   | 0.7 (0.6, 0.7) |
| <b>Maternal education (years)</b>                |                |             |                |
| Less than 12 (n = 60,798)                        | 46,560 (76.6)  | 2,095 (3.5) | 2.0 (1.9, 2.1) |

|                                                 |                |              |                             |
|-------------------------------------------------|----------------|--------------|-----------------------------|
| 12 (n = 124,027)                                | 103,920 (83.8) | 2,318 (1.9)  | Reference                   |
| More than 12 (n = 217,159)                      | 193,519 (89.1) | 2,395 (1.1)  | 0.6 (0.5, 0.6)              |
| <b>Parity</b>                                   |                |              |                             |
| Nulliparous (n = 153,763)                       | 131,130 (85.3) | 2,953 (1.9)  | 1.2 (1.2, 1.3)              |
| Multiparous (n = 254,417)                       | 217,825 (85.6) | 4,011 (1.6)  | Reference                   |
| <b>Smoked</b>                                   |                |              |                             |
| No (n = 401,722)                                | 343,849 (85.6) | 6,786 (1.7)  | Reference                   |
| Yes (n = 6,650)                                 | 5,174 (77.8)   | 179 (2.7)    | 1.7 (1.5, 2.0)              |
| <b>Drugs or alcohol use</b>                     |                |              |                             |
| No (n = 405,101)                                | 346,614 (85.6) | 6,827 (1.7)  | Reference                   |
| Yes (n = 3,271)                                 | 2,409 (73.7)   | 138 (4.2)    | 2.8 (2.4, 3.3)              |
| <b>Mental illness</b>                           |                |              |                             |
| No (n = 398,832)                                | 340,955 (85.5) | 6,769 (1.7)  | Reference                   |
| Yes (n = 9,247)                                 | 8,068 (84.6)   | 196 (2.1)    | 1.2 (1.1, 1.4)              |
| <b>WIC participant</b>                          |                |              |                             |
| No (n = 234,488)                                | 206,873 (88.2) | 3,020 (1.3)  | Reference                   |
| Yes (n = 168,711)                               | 137,979 (81.8) | 3,855 (2.3)  | 1.9 (1.8, 2.0)              |
| <b>FIPS Code</b>                                |                |              |                             |
| 1 (most urban) (n = 258,411)                    | 223,131 (86.4) | 4,190 (1.6)  | Reference                   |
| 2 (n = 55,700)                                  | 48,302 (86.7)  | 852 (1.5)    | 0.9 (0.9, 1.0)              |
| 3 (n = 73,272)                                  | 62,104 (84.8)  | 1,085 (1.5)  | 0.9 (0.9, 1.0) <sup>a</sup> |
| 4, 5 or 6 (n = 20,038)                          | 14,704 (73.4)  | 811 (4.1)    | 2.8 (2.6, 3.1)              |
| <hr/>                                           |                |              |                             |
| <b>Hispanic, public insurance (n = 966,351)</b> | 741,649 (76.8) | 35,297 (3.7) |                             |
| <hr/>                                           |                |              |                             |
| <b>Maternal age (years)</b>                     |                |              |                             |
| Less than 18 (n = 49,866)                       | 31,223 (62.6)  | 3,308 (6.6)  | 2.2 (2.1, 2.3)              |
| 18 – 34 (n = 808,417)                           | 624,937 (77.3) | 28,633 (3.5) | Reference                   |
| More than 34 (n = 108,034)                      | 85,476 (79.1)  | 3,350 (3.1)  | 0.9 (0.8, 0.9)              |
| <b>Maternal education (years)</b>               |                |              |                             |
| Less than 12 (n = 498,275)                      | 377,476 (75.8) | 19,819 (4.0) | 1.2 (1.2, 1.3)              |
| 12 (n = 290,589)                                | 225,518 (77.6) | 9,593 (3.3)  | Reference                   |
| More than 12 (n = 150,398)                      | 118,754 (79.0) | 4,853 (3.2)  | 1.0 (0.9, 1.0) <sup>a</sup> |
| <b>Parity</b>                                   |                |              |                             |
| Nulliparous (n = 322,295)                       | 243,718 (75.6) | 13,312 (4.1) | 1.2 (1.2, 1.3)              |
| Multiparous (n = 643,801)                       | 497,740 (77.3) | 21,978 (3.4) | Reference                   |
| <b>Smoked</b>                                   |                |              |                             |

|                                              |                |              |                             |
|----------------------------------------------|----------------|--------------|-----------------------------|
| No (n = 933,027)                             | 719,283 (77.1) | 33,296 (3.6) | Reference                   |
| Yes (n = 32,375)                             | 22,366 (67.1)  | 2,001 (6.0)  | 1.9 (1.8, 1.9)              |
| <b>Drugs or alcohol use</b>                  |                |              |                             |
| No (n = 951,808)                             | 732,972 (77.0) | 34,236 (3.6) | Reference                   |
| Yes (n = 14,543)                             | 8,677 (59.7)   | 1,061 (7.3)  | 2.4 (2.3, 2.6)              |
| <b>Mental illness</b>                        |                |              |                             |
| No (n = 947,856)                             | 729,364 (77.0) | 34,233 (3.6) | Reference                   |
| Yes (n = 18,495)                             | 12,285 (66.4)  | 1,064 (5.8)  | 1.8 (1.7, 1.9)              |
| <b>WIC participant</b>                       |                |              |                             |
| No (n = 83,529)                              | 56,812 (68.0)  | 4,911 (5.9)  | Reference                   |
| Yes (n = 868,835)                            | 674,704 (77.7) | 29,970 (3.5) | 0.5 (0.5, 0.6)              |
| <b>FIPS Code</b>                             |                |              |                             |
| 1 (most urban) (n = 585,278)                 | 468,122 (80.0) | 17,861 (3.1) | Reference                   |
| 2 (n = 93,400)                               | 72,476 (77.6)  | 2,974 (3.2)  | 1.1 (1.0, 1.1) <sup>a</sup> |
| 3 (n = 232,950)                              | 166,763 (71.6) | 10,622 (4.6) | 1.6 (1.6, 1.7)              |
| 4, 5 or 6 (n = 52,653)                       | 32,865 (62.4)  | 3,722 (7.1)  | 2.8 (2.7, 2.9)              |
| <hr/>                                        |                |              |                             |
| <b>Black, private insurance (n = 56,060)</b> | 46,702 (83.3)  | 1,107 (2.0)  |                             |
| <hr/>                                        |                |              |                             |
| <b>Maternal age (years)</b>                  |                |              |                             |
| Less than 18 (n = 1,262)                     | 694 (55.0)     | 106 (8.4)    | 5.6 (4.6, 6.8)              |
| 18 – 34 (n = 43,006)                         | 35,665 (82.9)  | 869 (2.0)    | Reference                   |
| More than 34 (n = 11,790)                    | 10,342 (87.7)  | 132 (1.1)    | 0.5 (0.4, 0.6)              |
| <b>Maternal education (years)</b>            |                |              |                             |
| Less than 12 (n = 3,021)                     | 1,895 (62.7)   | 200 (6.6)    | 3.0 (2.5, 3.6)              |
| 12 (n = 13,270)                              | 10,506 (79.2)  | 350 (2.6)    | Reference                   |
| More than 12 (n = 38,840)                    | 33,581 (86.5)  | 537 (1.4)    | 0.5 (0.4, 0.6)              |
| <b>Parity</b>                                |                |              |                             |
| Nulliparous (n = 24,678)                     | 20,603 (83.5)  | 509 (2.1)    | 1.1 (1.0, 1.2)              |
| Multiparous (n = 31,352)                     | 26,084 (83.2)  | 589 (1.9)    | Reference                   |
| <b>Smoked</b>                                |                |              |                             |
| No (n = 54,027)                              | 45,238 (83.7)  | 1,042 (1.9)  | Reference                   |
| Yes (n = 2,033)                              | 1,464 (72.0)   | 65 (3.2)     | 1.9 (1.5, 2.4)              |
| <b>Drugs or alcohol use</b>                  |                |              |                             |
| No (n = 54,596)                              | 45,662 (83.6)  | 1,045 (1.9)  | Reference                   |
| Yes (n = 1,464)                              | 1,040 (71.0)   | 62 (4.2)     | 2.5 (1.9, 3.2)              |
| <b>Mental illness</b>                        |                |              |                             |

|                                             |               |             |                             |
|---------------------------------------------|---------------|-------------|-----------------------------|
| No (n = 53,421)                             | 44,613 (83.5) | 1,023 (1.9) | Reference                   |
| Yes (n = 2,639)                             | 2,089 (79.2)  | 84 (3.2)    | 1.7 (1.4, 2.2)              |
| <b>WIC participant</b>                      |               |             |                             |
| No (n = 32,146)                             | 27,861 (86.7) | 481 (1.5)   | Reference                   |
| Yes (n = 23,229)                            | 18,300 (78.8) | 618 (2.7)   | 1.9 (1.7, 2.2)              |
| <b>FIPS Code</b>                            |               |             |                             |
| 1 (most urban) (n = 40,312)                 | 33,862 (84.0) | 722 (1.8)   | Reference                   |
| 2 (n = 8,720)                               | 7,424 (83.0)  | 186 (2.1)   | 1.2 (1.0, 1.4)              |
| 3 (n = 5,884)                               | 4,800 (81.6)  | 143 (2.4)   | 1.4 (1.2, 1.7)              |
| 4, 5 or 6 (n = 772)                         | 497 (64.4)    | 53 (6.9)    | 4.6 (3.5, 6.1)              |
| <b>Black, public insurance (n = 89,886)</b> | 63,675 (70.8) | 4,043 (4.5) |                             |
| <b>Maternal age (years)</b>                 |               |             |                             |
| Less than 18 (n = 4,388)                    | 2,503 (57.0)  | 335 (7.6)   | 2.1 (1.9, 2.3)              |
| 18 – 34 (n = 77,892)                        | 55,801 (71.6) | 3,344 (4.3) | Reference                   |
| More than 34 (n = 7,600)                    | 5,370 (70.7)  | 364 (4.8)   | 1.1 (1.0, 1.3) <sup>a</sup> |
| <b>Maternal education (years)</b>           |               |             |                             |
| Less than 12 (n = 20,459)                   | 12,662 (61.9) | 1,344 (6.6) | 1.8 (1.7, 1.9)              |
| 12 (n = 35,552)                             | 25,763 (72.5) | 1,461 (4.1) | Reference                   |
| More than 12 (n = 31,589)                   | 23,774 (75.3) | 1,127 (3.6) | 0.8 (0.8, 0.9)              |
| <b>Parity</b>                               |               |             |                             |
| Nulliparous (n = 35,935)                    | 26,053 (72.5) | 2,524 (4.7) | 0.9 (0.8, 0.9)              |
| Multiparous (n = 53,898)                    | 37,608 (69.8) | 1,516 (4.2) | Reference                   |
| <b>Smoked</b>                               |               |             |                             |
| No (n = 77,755)                             | 56,406 (72.5) | 3,225 (4.2) | Reference                   |
| Yes (n = 11,803)                            | 7,269 (59.9)  | 818 (6.7)   | 1.9 (1.7, 2.0)              |
| <b>Drugs or alcohol use</b>                 |               |             |                             |
| No (n = 83,381)                             | 59,741 (71.7) | 3,621 (4.3) | Reference                   |
| Yes (n = 6,505)                             | 3,934 (60.5)  | 422 (6.5)   | 1.7 (1.5, 1.9)              |
| <b>Mental illness</b>                       |               |             |                             |
| No (n = 83,077)                             | 59,417 (71.5) | 3,629 (4.4) | Reference                   |
| Yes (n = 6,809)                             | 4,258 (62.5)  | 414 (6.1)   | 1.5 (1.4, 1.7)              |
| <b>WIC participant</b>                      |               |             |                             |
| No (n = 14,193)                             | 9,187 (64.7)  | 805 (5.7)   | Reference                   |
| Yes (n = 73,957)                            | 53,338 (72.1) | 3,171 (4.3) | 0.7 (0.6, 0.8)              |
| <b>FIPS Code</b>                            |               |             |                             |

|                                               |                |             |                             |
|-----------------------------------------------|----------------|-------------|-----------------------------|
| 1 (most urban) (n = 62,048)                   | 44,070 (71.0)  | 2,712 (4.4) | Reference                   |
| 2 (n = 11,665)                                | 8,831 (74.0)   | 468 (3.9)   | 0.9 (0.8, 1.0) <sup>a</sup> |
| 3 (n = 14,011)                                | 9,680 (69.1)   | 716 (5.1)   | 1.2 (1.1, 1.3)              |
| 4, 5 or 6 (n = 1,587)                         | 916 (57.7)     | 122 (7.7)   | 2.0 (1.7, 2.4)              |
| <b>Asian, private insurance (n = 256,998)</b> | 232,318 (90.4) | 2,251 (0.9) |                             |
| <b>Maternal age (years)</b>                   |                |             |                             |
| Less than 18 (n = 358)                        | 129 (36.0)     | 56 (15.6)   | 28.3 (21.7, 37.0)           |
| 18 – 34 (n = 176,977)                         | 159,329 (90.0) | 1,721 (1.0) | Reference                   |
| More than 34 (n = 79,661)                     | 72,860 (91.5)  | 474 (0.6)   | 0.6 (0.5, 0.7)              |
| <b>Maternal education (years)</b>             |                |             |                             |
| Less than 12 (n = 3,568)                      | 2,671 (74.9)   | 116 (3.3)   | 2.3 (1.9, 2.8)              |
| 12 (n = 22,008)                               | 18,379 (83.5)  | 337 (1.5)   | Reference                   |
| More than 12 (n = 226,670)                    | 207,281 (91.5) | 1,725 (0.8) | 0.5 (0.4, 0.5)              |
| <b>Parity</b>                                 |                |             |                             |
| Nulliparous (n = 122,301)                     | 111,088 (90.8) | 1,186 (1.0) | 1.2 (1.1, 1.3)              |
| Multiparous (n = 134,624)                     | 121,206 (90.0) | 1,065 (0.8) | Reference                   |
| <b>Smoked</b>                                 |                |             |                             |
| No (n = 254,491)                              | 230,249 (90.5) | 2,208 (0.9) | Reference                   |
| Yes (n = 2,446)                               | 2,069 (82.5)   | 43 (1.7)    | 2.1 (1.6, 2.9)              |
| <b>Drug or alcohol use</b>                    |                |             |                             |
| No (n = 256,624)                              | 232,029 (90.4) | 2,235 (0.9) | Reference                   |
| Yes (n = 361)                                 | 289 (77.3)     | 16 (4.3)    | 5.5 (3.4, 9.0)              |
| <b>Mental illness</b>                         |                |             |                             |
| No (n = 254,384)                              | 229,985 (90.4) | 2,220 (0.9) | Reference                   |
| Yes (n = 2,512)                               | 2,333 (89.3)   | 31 (1.2)    | 1.4 (1.0, 2.0)              |
| <b>WIC participant</b>                        |                |             |                             |
| No (n = 228,153)                              | 208,249 (91.3) | 1,762 (0.8) | Reference                   |
| Yes (n = 25,398)                              | 21,594 (83.1)  | 459 (1.8)   | 2.5 (2.2, 2.7)              |
| <b>FIPS Code</b>                              |                |             |                             |
| 1 (most urban) (n = 199,418)                  | 181,612 (91.1) | 1,539 (0.8) | Reference                   |
| 2 (n = 32,254)                                | 29,331 (90.9)  | 317 (1.0)   | 1.3 (1.1, 1.4)              |
| 3 (n = 21,159)                                | 18,298 (86.5)  | 275 (1.3)   | 1.8 (1.5, 2.0)              |
| 4, 5 or 6 (n = 3,544)                         | 2,540 (71.7)   | 102 (2.9)   | 4.6 (3.8, 5.6)              |
| <b>Asian, public insurance (n = 81,390)</b>   | 59,065 (72.6)  | 3,148 (3.9) |                             |
| <b>Maternal age (years)</b>                   |                |             |                             |

|                                   |               |             |                |
|-----------------------------------|---------------|-------------|----------------|
| Less than 18 (n = 1,425)          | 636 (44.6)    | 143 (10.0)  | 3.6 (3.0, 4.2) |
| 18 – 34 (n = 64,452)              | 46,647 (72.4) | 2,525 (3.9) | Reference      |
| More than 34 (n = 15,510)         | 11,779 (75.9) | 480 (3.1)   | 0.8 (0.7, 0.8) |
| <b>Maternal education (years)</b> |               |             |                |
| Less than 12 (n = 11,284)         | 7,400 (65.6)  | 552 (4.9)   | 1.4 (1.3, 1.6) |
| 12 (n = 26,974)                   | 19,385 (71.9) | 992 (3.7)   | Reference      |
| More than 12 (n = 40,122)         | 30,339 (75.6) | 1,489 (3.7) | 1.0 (0.9, 1.0) |
| <b>Parity</b>                     |               |             |                |
| Nulliparous (n = 34,804)          | 25,024 (71.9) | 1,527 (4.4) | 1.3 (1.2, 1.4) |
| Multiparous (n = 46,563)          | 34,028 (73.1) | 1,619 (3.5) | Reference      |
| <b>Smoked</b>                     |               |             |                |
| No (n = 78,777)                   | 57,480 (73.0) | 2,980 (3.8) | Reference      |
| Yes (n = 2,544)                   | 1,585 (60.7)  | 168 (6.4)   | 1.9 (1.7, 2.3) |
| <b>Drugs or alcohol use</b>       |               |             |                |
| No (n = 80,624)                   | 58,711 (72.8) | 3,067 (3.8) | Reference      |
| Yes (n = 744)                     | 354 (46.2)    | 81 (10.6)   | 3.8 (3.0, 4.7) |
| <b>Mental illness</b>             |               |             |                |
| No (n = 80,229)                   | 58,409 (72.8) | 3,058 (3.8) | Reference      |
| Yes (n = 1,127)                   | 656 (56.5)    | 90 (7.8)    | 2.4 (2.0, 3.0) |
| <b>WIC participant</b>            |               |             |                |
| No (n = 19,435)                   | 13,719 (70.6) | 946 (4.8)   | Reference      |
| Yes (n = 60,875)                  | 44,650 (73.4) | 2,154 (3.5) | 0.7 (0.7, 0.8) |
| <b>FIPS Code</b>                  |               |             |                |
| 1 (most urban) (n = 56,255)       | 42,292 (75.2) | 1,996 (3.6) | Reference      |
| 2 (n = 5,134)                     | 3,686 (71.8)  | 247 (4.8)   | 1.4 (1.2, 1.6) |
| 3 (n = 16,317)                    | 11,232 (68.8) | 676 (4.1)   | 1.3 (1.2, 1.4) |
| 4, 5 or 6 (n = 3,506)             | 1,734 (49.5)  | 220 (6.3)   | 2.5 (2.2, 2.9) |

---

cRR: crude relative risk; CI: confidence interval; WIC: Women, Infants and Children's program; FIPS: Federal Information Processing Standard, scale of 1 (most urban) to 6 (most rural)

<sup>a</sup> p < 0.05
